# Supplementary material
Source: PubMed Central journal article supplement (PMC1533775)
Supplement: pnas_0505704103_3.pdf [file pnas_0505704103_3.pdf]

```

Neurospora : MQFTSVFTILLAIAMTAAAPAEVVPR-----ATTIGPNTCSIDDYKPYCCQSMGSPAGSPGLNLI PVD-LSASLG-----CVV : 73
AnidulansA : MKEIGLATLSLFAALASA-----DKFVVPDSITVAEGSSKCGDQAQLS-CCNDVKYGGDTTVVQKGI AAGLLSDLGAGSAAEGLGAFSGCSK : 86
Aspergillu : MKE SLSAAVLAFVSVVAALPQHDVNAAGNGVGNKGNANVRFVPPDDITVKQATEKCGDQAQLS-CCNKATYAGDVTDI DEGILAGTLKNLIGGGSGTEGLGLFNQCSN : 107
Cladospori : MQFTSFAILAISAVASA-----RVTRRDDSSATGADKGGTCAVGSQIS-CCFTNSSSGSDILGNVLGGS-----CLL : 65
Cladospori : MAFIKSLLLIASVA AVAFAAPQGG A-----SDNNKKVEIDGQDSAPVCGNGQKVA-CCNSGEDLIGLN-----CLS : 64
Gibberella : MQYMTIVAFI-AAT--VAA-GPQ-----IRAYPSIDQITVAQANNACGNMNVQVT-CCNKVTNT PAGNAVGNAGILNNLSLFDQ-----CSK : 77
Gibberella : MQEAKIASVLAMAAA AVAAPAG-----NYEVEPRTGGSNNGNNQPACSAQSSNV-CCNGLG-----CLV : 59
Magnaporth : MFSLKTVVLAALAAAFVQAI PA-----PGEGPSVSM AQKCGAEKVVS-CCNSKELKNSKS--GAEIPIDVLSGE-----CKN : 70
Metarhiziu : MFKALIVALAAVAAAIPTQQPS-----SNEMNCDSGVY--CCNKVAQNT----GIVVPIDALSST-----CGD : 57
Paracoccid : MQLSNIVAVVALLATTAVASRSPRP-----QRPSRPVAPVFQSIQCSSGSPF-CCAPESTLGGT-----CTA : 62
Paracoccid : MKE SLTAVVLAALATAAVAAPGGNYKG-----AGPR--EEGPSISRQCGQAQIS-CCNKQISTVNGGDKNSGLLNGVLGTVIGKGGSVGIFDQ--CSK : 87
Venturiain : MFSKAILFFSVLSIA-MAAPGSKTTA-----PGTF SVEDQSCGDGQQVS-CCSDTAGSLLGLT-----CVV : 60
Xanthoriae : -----TPGQAVQNKCSQGQTAK-CCNSLSKAVANLIPIQIGLN-----CVS : 41

```

m

a

C

CC

C

```

Neurospora : GVIGSQ-----CGASVK--CCKDDVTNTGNSFLIINAANCVA----- : 108
AnidulansA : LDISLLIGIEDILNQK--CKQNTA--CCAKSGGSADGDLVGATLP-CTALGSIL----- : 135
Aspergillu : VDLQIPVIGIPIQALVNQKCKQNTA--CCQNSPSDASGSLIGLGLP-CTALGSIL----- : 159
Cladospori : DNVSLISSLNSN-----CPAGNTF-CCPSNQDGTLNINVS----CTPVSA----- : 105
Cladospori : IPI LAIPIQKA-----CGSNIAA-CCQTGDSEGNLLNLEAN--CLAIPL----- : 105
Gibberella : LDVNVLAIANGLLNKE--CQANAA--CCQNSGGSATGGLVNVALP-CTALSSLI----- : 126
Gibberella : QILGAG-----CSTKSY--CCQSDAPLAVGALVNVNALNCVQVL----- : 96
Magnaporth : IPI NILTINQLIPINNF--CSDTVS--CCSGEQIGLVNIQ-----CTPILS----- : 112
Metarhiziu : TLKLVTVDALNDK-----CTSQTV--CCNNVQQNGLVNVA-----CTPIDV----- : 96
Paracoccid : MSGSSVQ-----CNSLIV--CCNNNGSGTQV-----CSATLQQPVNFVDL : 100
Paracoccid : LSI SALIGVTDNLNSQ--CKQTV A--CCQGD SKA EGLVALNLP--CTIPTAAL----- : 133
Venturiain : PIINA-----CAQNSAACCKTEQTGLINVGLD-----CTIPTAL----- : 94
Xanthoriae : LDIISVLPIGKQ-----CTQSQALACCSSGQQTGLVNLGNV----CVPVSL----- : 83

```

C

CC

C
