# Supplementary material
Source: PubMed Central journal article supplement (PMC1533775)
Supplement: pnas_0505704103_6.pdf [file pnas_0505704103_6.pdf]

**Table 1. Tabulated  $m/z$  values of predicted and observed peptide fragments and  $\beta$ -elimination products**

| <b>Open Cys9-Cys60</b>                                            |                           |                          |
|-------------------------------------------------------------------|---------------------------|--------------------------|
| <b>Fragment</b>                                                   | <b>Predicted mass, Da</b> | <b>Observed mass, Da</b> |
| Ala <sub>1</sub> -Cys <sub>18</sub>                               | 772.88                    | N.D.                     |
| itz <sub>9</sub> -Lys <sub>59</sub>                               | 5,086.94                  | 5,080.695*               |
| itz <sub>60</sub> -Ala <sub>82</sub>                              | 2,411.74                  | 2,413.79                 |
| Ala <sub>1</sub> -( $\beta$ Cys <sub>9</sub> )Lys <sub>59</sub>   | 5,764.72                  | 5,770.79                 |
| itz <sub>9</sub> -( $\beta$ Cys <sub>60</sub> )Ala <sub>82</sub>  | 7,421.57                  | 7,447.43 <sup>†</sup>    |
| <b>Open Cys18-Cys54</b>                                           |                           |                          |
| Ala <sub>1</sub> -Tyr <sub>17</sub>                               | 1,857.1                   | 1,857.04                 |
| itz <sub>18</sub> -Gln <sub>53</sub>                              | 3,454.1                   | 3,436.10* <sup>‡</sup>   |
| itz <sub>54</sub> -Ala <sub>82</sub>                              | 2,957.4                   | 2,956.85                 |
| Ala <sub>1</sub> -( $\beta$ Cys <sub>18</sub> )Gln <sub>53</sub>  | 5,237.05                  | 5,238.07*                |
| itz <sub>18</sub> -( $\beta$ Cys <sub>54</sub> )Ala <sub>82</sub> | 6,336.36                  | N.D.                     |
| <b>Open Cys19-Cys45</b>                                           |                           |                          |
| Ala <sub>1</sub> -Cys <sub>18</sub>                               | 1,961.23                  | N.D.                     |
| itz <sub>19</sub> -Gly <sub>44</sub>                              | 2,508.92                  | 2,509.55*                |
| itz <sub>45</sub> -Ala <sub>82</sub>                              | 3,800.42                  | 3,796.94*                |
| Ala <sub>1</sub> -( $\beta$ Cys <sub>19</sub> )Gly <sub>44</sub>  | 4,394.03                  | 4,409.147 <sup>§</sup>   |
| itz <sub>19</sub> -( $\beta$ Cys <sub>45</sub> )Ala <sub>82</sub> | 6,233.22                  | N.D.                     |
| <b>Open Cys61-Cys80</b>                                           |                           |                          |
| Ala <sub>1</sub> -Cys <sub>60</sub>                               | 5,919.94                  | 5,902.98 <sup>‡</sup>    |
| itz <sub>61</sub> -Asn <sub>79</sub>                              | 2,035.24                  | 2,036.25                 |
| itz <sub>80</sub> -Ala <sub>82</sub>                              | 3,16.38                   | N.D.                     |
| Ala <sub>1</sub> -( $\beta$ Cys <sub>61</sub> )Asn <sub>79</sub>  | 7,878.07                  | 7,894.07 <sup>§</sup>    |
| itz <sub>61</sub> -( $\beta$ Cys <sub>80</sub> )Ala <sub>82</sub> | 2,274.51                  | N.D.                     |

Fragments highlighted in gray are unique to a particular fingerprint. N.D., not detected; itz, iminothiazolidinyl carboxyl residue. Cys<sub>x</sub>-Cys<sub>y</sub> designates the disulfide bond that is reduced in the singly reduced and cyanylated species. Ala<sub>1</sub>-(X<sub>x-1</sub>), itz<sub>x</sub>-X<sub>y-1</sub>, and itz<sub>y</sub>-Ala<sub>82</sub>, designates the S-cyanil cleavage products. Ala<sub>1</sub>-( $\beta$ Cys<sub>x</sub>)-X<sub>y-1</sub> and itz<sub>x</sub>-( $\beta$ Cys<sub>y</sub>)-Ala<sub>82</sub> designate the  $\beta$ -elimination products.  $\beta$ Cys<sub>x</sub> and  $\beta$ Cys<sub>y</sub> refer to the position of the Cys modified by the  $\beta$ -elimination reaction. X = any amino acid residue; subscript symbols refer to the position of designated singly reduced and cyanylated Cys residues.

\*Denotes that both the oxidized and non-oxidized M22 are detected.

†The ion detected is as an adduct with  $\text{Na}^+$ .

‡The ion detected has lost  $\text{H}_2\text{O}$ .

§Only the oxidized M22 is detected.
