# Supplementary material
Source: PubMed Central journal article supplement (PMC1533775)
Supplement: pnas_0505704103_7.pdf [file pnas_0505704103_7.pdf]

**Table 2. Structural statistics for EAS**

| <b>Experimental input</b>                                                              | <b>Value</b>          |
|----------------------------------------------------------------------------------------|-----------------------|
| Total NOE restraints                                                                   | 1,623                 |
| Total unambiguous restraints                                                           | 1,441                 |
| Intraresidue                                                                           | 747                   |
| Sequential                                                                             | 409                   |
| Medium range (2–4 residues)                                                            | 59                    |
| Long range ( $\geq 5$ residues)                                                        | 226                   |
| Total ambiguous restraints                                                             | 182                   |
| Torsion angle constraints                                                              |                       |
| Dihedrals $\phi$                                                                       | 63                    |
| Dihedrals $\psi$                                                                       | 27                    |
| Hydrogen-bond restraints (between residues 15–61, 59–17, 57–19, 62–79, 60–81)          | 10                    |
| Disulfide bond restraints (between residues 9–60, 18–54, 19–45, 61–80)                 | 4                     |
| Quality control                                                                        |                       |
| PROCHECK statistics: residues in most favored regions (residues 2–5,13–20,42–63,72-81) | 82.5%                 |
| Residues in allowed regions                                                            | 15.7%                 |
| Residues in generously allowed regions                                                 | 1.3%                  |
| Residues in disallowed regions                                                         | 0.5%                  |
| rms deviation of backbone atoms                                                        |                       |
| 2–5,13–20,42–63,72-81                                                                  | $0.67 \pm 0.14$       |
| 2–20,42–63,72-81                                                                       | $0.79 \pm 0.16$       |
| rms deviation of all heavy atoms                                                       |                       |
| 2–5,13–20,42–63,72-81                                                                  | $1.00 \pm 0.12$       |
| 2–20,42–63,72-81                                                                       | $1.13 \pm 0.16$       |
| Mean deviations from ideal geometry                                                    |                       |
| Bond lengths, Å                                                                        | $0.0035 \pm 0.0001$   |
| Bond angles                                                                            | $0.42 \pm 0.02^\circ$ |
