# Supplementary material
Source: PubMed Central journal article supplement (PMC1533775)

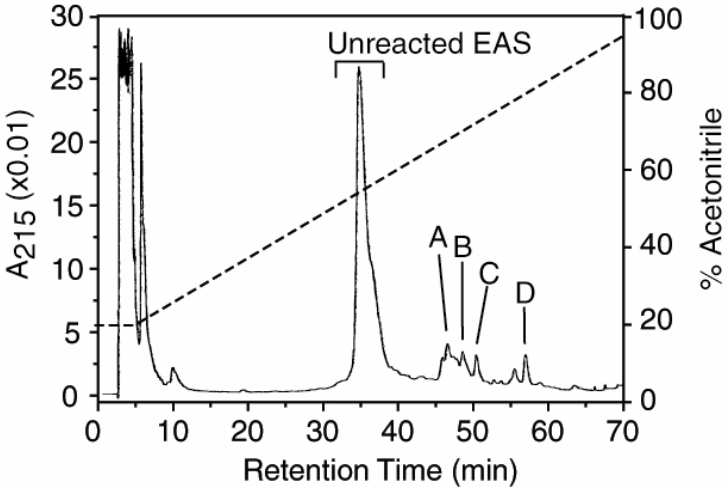

Supplement: pnas_0505704103_1.pdf [file pnas_0505704103_1.pdf]

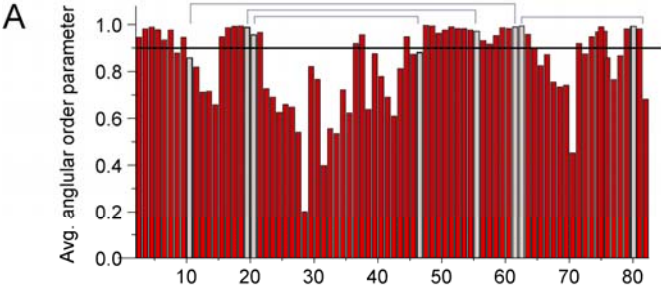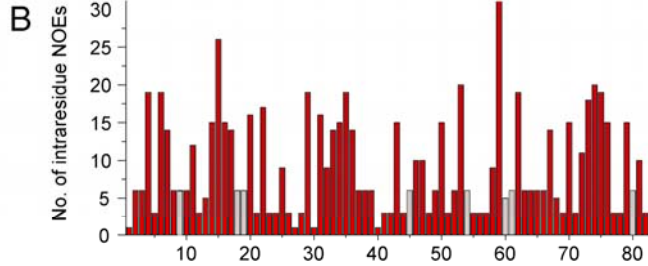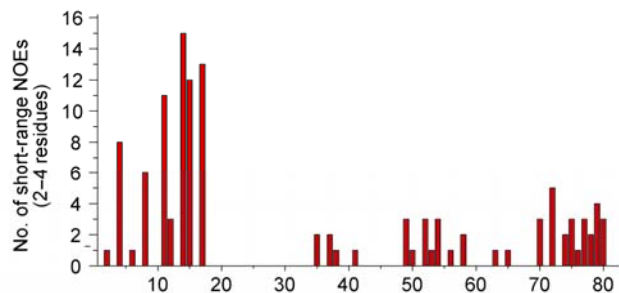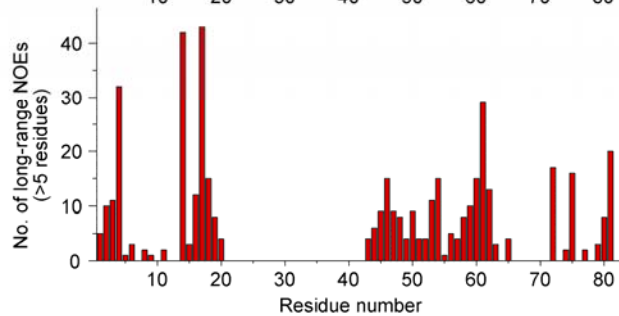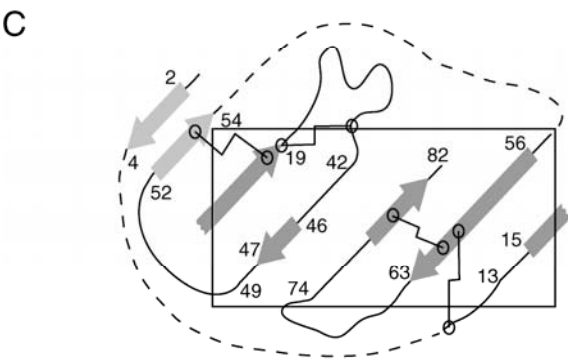

Supplement: pnas_0505704103_2.pdf [file pnas_0505704103_2.pdf]

**A**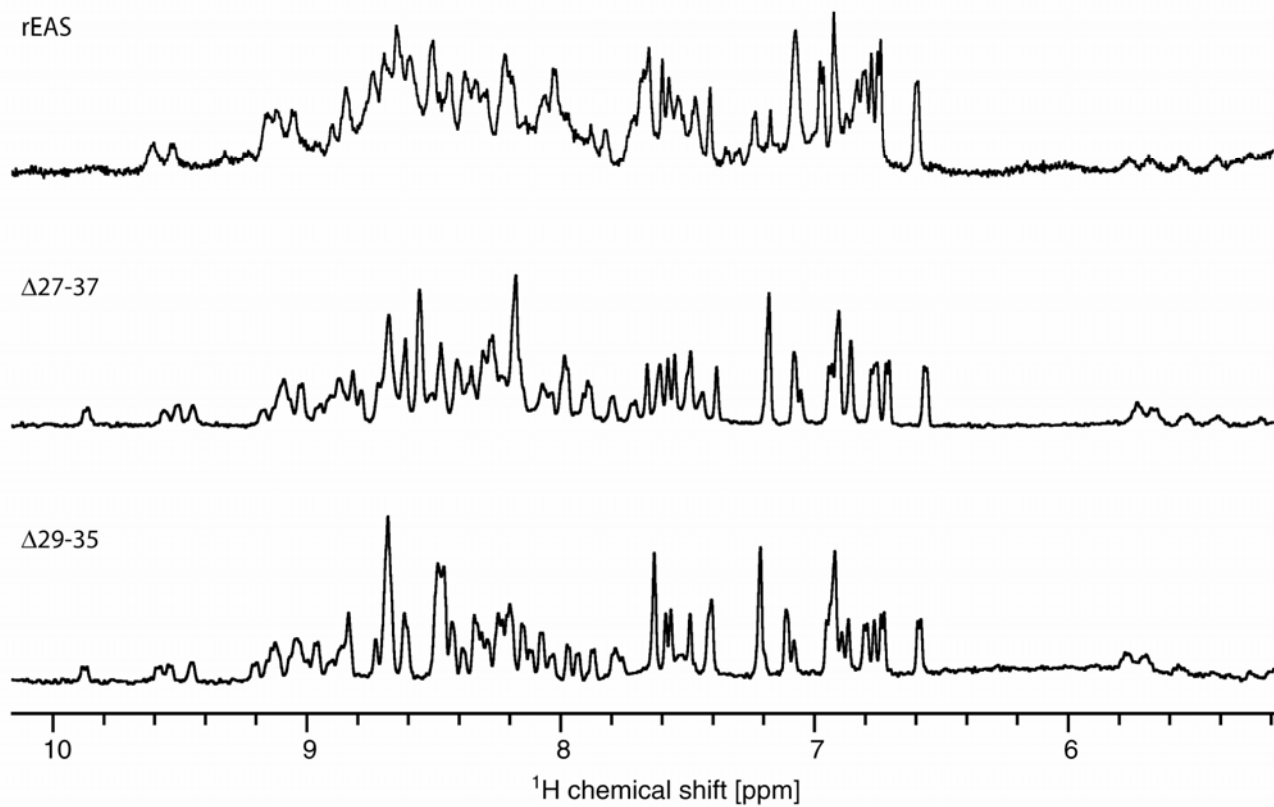**B**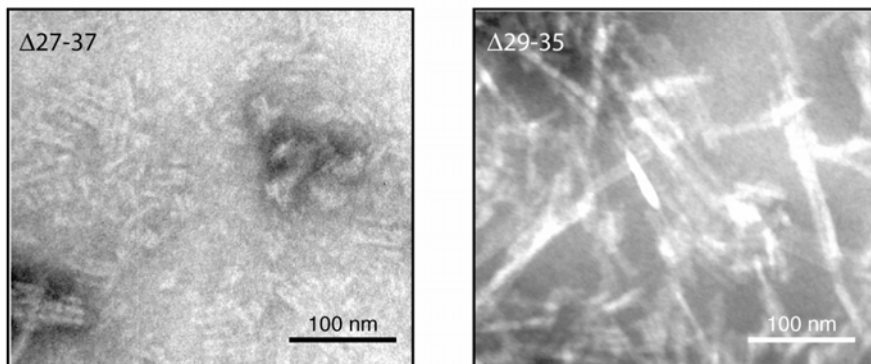

Supplement: pnas_0505704103_4.pdf [file pnas_0505704103_4.pdf]

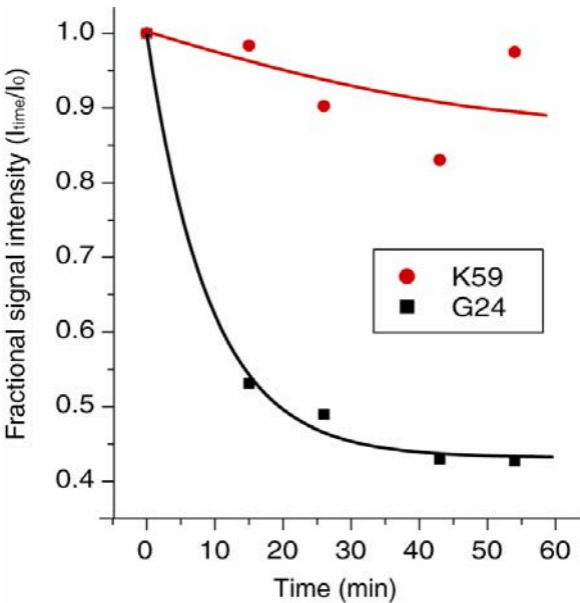

Supplement: pnas_0505704103_5.pdf [file pnas_0505704103_5.pdf]
